1 **Title:**

2 **Transmission dynamics of coronavirus disease 2019 outside of Daegu-Gyeongsangbuk**  
3 **provincial region in South Korea**

4

5 **Authors:**

6 Sukhyun Ryu<sup>1</sup>, Sheikh Taslim Ali<sup>2</sup>, Cheolsun Jang<sup>1</sup>, Baekjin Kim<sup>1</sup>, Benjamin J. Cowling<sup>2</sup>

7

8 **Affiliation:**

9 1. Department of Preventive Medicine, Konyang University College of Medicine, Daejeon,  
10 Republic of Korea

11 2. WHO Collaborating Centre for Infectious Disease Epidemiology and Control, School of  
12 Public Health, Li Ka Shing Faculty of Medicine, The University of Hong Kong, Hong Kong  
13 Special Administrative Region, China

14

15

16

17

18

19 **Abstract**

20 We analyzed transmission of coronavirus disease 2019 in South Korea. We estimated that  
21 non-pharmaceutical measures reduced the immediate transmissibility by maximum of 34% for  
22 coronavirus disease 2019. Continuous efforts are needed for monitoring the transmissibility to  
23 optimize epidemic control.

24 **Main text**

25 The first coronavirus diseases 2019 (COVID-19) infection was identified on January 20, 2020, in  
26 South Korea (1). By April 21, 2020, South Korea has been experienced the epidemics of  
27 COVID-19 with 10,683 laboratory-confirmed cases, including 237 deaths (2) (Figure 1A).  
28 Super-spreading events occurred in the Daegu-Gyeongsangbuk provincial regions, which  
29 contributed a large number of cases and deaths of COVID-19 in Korea (Figure 1B). In the early  
30 phase of the COVID-19 outbreak in Korea, Korean public health authorities mainly conducted  
31 contact tracing of confirmed cases and quarantining of suspected and confirmed cases (3).  
32 However, as the number of COVID-19 cases increased, Korean public health authorities raised  
33 the infectious disease alert to its highest level on February 23, 2020 and addressed the public to  
34 report illness related to COVID-19 for screening.

35  
36 As of April 21, 2020, the epidemic of COVID-19 has been contained in Korea, and from  
37 April 19, 2020, the Korean public health authorities started to relax some of the social distancing  
38 measures, which were implemented on March 21, 2020. Recent studies examined how public  
39 health interventions can possibly contain the first wave of COVID-19 outbreak (4, 5). However,  
40 there has been no information on public health measures against the transmission dynamics of  
41 COVID-19 in Korea, which is valuable for preparedness of future epidemics. The purpose of this  
42 study is to estimate the transmissibility of COVID-19 and evaluate the impact of the public  
43 health measures implemented outside the Daegu-Gyeongsangbuk provincial region, South  
44 Korea.

45

## 46 **The study**

47 We collected data published by local public health authorities including the city or  
48 provincial department of public health in South Korea. The data comprised the date of exposure,  
49 date of illness onset, as well as the source of infection including contact history and demographic  
50 characteristics, including birth year and gender. We extracted the information of the cases by  
51 using a structured data-extraction form. We divided the study period into two on the declaration  
52 of highest public alert; period-1 (January 20 to February 23, 2020) and period-2 (February 24 to  
53 April 21, 2020). We restricted our analysis to the regions in South Korea excluding Daegu-  
54 Gyeongsangbuk provincial region, where there were super spreading events and the data have  
55 not been made publicly available (6). A total of 2,023 cases were collected during two months  
56 (from January 20 to April 21, 2020), which accounts for 98% of 2,066 reported cases from the  
57 Korean Ministry of Health and Welfare.

58  
59 The median age of cases was 42 (range 1-102), and 820 (41%) was male (Table 1). We  
60 analysed the statistical difference in age and sex between period-1 and period-2 by using the chi-  
61 squared test; However, we have not identified any significant difference. In period-1, the  
62 proportion of imported cases from Daegu-Gyeongsangbuk provincial regions were 31% and  
63 reduced to 5% in period-2. However, the proportion of imported cases from abroad and cases  
64 occurring in large clusters increased from 8% to 30%.

65  
66 We analyzed the time interval between illness onset and laboratory confirmation for 818  
67 symptomatic cases. The estimated mean time interval from symptom onset to confirmation of  
68 COVID-19 during period-1 and period-2 was estimated by fitting three parametric distributions

69 (Weibull, gamma, and log-normal) and selected the best fit based on the Akaike information  
70 criterion (AIC) (7). The lognormal distribution found to be the best fit for this time interval with  
71 mean 4.6 (95% Confidence Interval (CI): 0.0–12.4) in period-1 and a significant reduction to 3.4  
72 (0.0–9.0) for period 2. We analyzed 181 cases having precise contact history with other  
73 confirmed cases to estimate the incubation period. The incubation period was estimated by fitting  
74 three parametric distributions and best fitted by the log-normal distribution, and the overall  
75 estimated median incubation period was 4.7 (95% CI, 0.1–15.6) days (Appendix). We identified  
76 44 clusters of infection and 79 cases who had clear exposure to only one index case among these  
77 clusters (Appendix). Overall, 8 of the 79 transmission pairs had negative serial intervals. The  
78 serial interval distribution was estimated by fitting a normal distribution to all 79 observations  
79 (8). We estimated a mean estimated serial interval was 3.9 days, with a standard deviation of 4.2  
80 days (Appendix).

81  
82 In Mid February 2020, the number of cases rapidly increased, and the largest proportion  
83 of cases were in persons infected in Daegu-Gyeongsangbuk provincial region and traveling to  
84 other regions of South Korea (Figure 2A). To investigate the effectiveness of non-  
85 pharmaceutical interventions implemented in Korea (Appendix), we estimated the instantaneous  
86 effective reproduction number ( $R_t$ ), from daily onset cases and our estimated serial interval  
87 distribution using the EpiEstim package in R (9, 10). The  $R_t$  is defined as the mean number of  
88 secondary infections per primary case with illness onset at time  $t$  and  $R_t$  below 1 indicates the  
89 epidemic is under control.

90

91           The daily estimates of  $R_t$  are presented from February 16, 2020, onward because the  
92   stable estimate of  $R_t$  was not available due to the low number of confirmed cases (Figure 2B).  
93   The mean  $R_t$  at the end of period-1 was reached up to the highest value of 2.85 (Credible  
94   Interval (CrI) 2.02, 3.87) on February 21, 2020, and then started to decline faster to below 1 by  
95   February 29, 2020.  $R_t$  further declined and sustained below 1 during the rest of the period-2,  
96   indicating the potential impact of different non-pharmaceutical interventions implemented over  
97   time, on COVID-19 transmission (Figure 2B). Specifically, the mean  $R_t$  was 2.23 (CrI 2.05, 2.40)  
98   before 1-week period of the declaration of the public alert to highest level and reduced to 1.48  
99   (CrI 1.36, 1.60) in the following 1-week period, corresponding to a 33.6% (95% CI 23.46%–  
100   43.44%) reduction in immediate transmissibility. Similarly along with high public alert, the strict  
101   social distancing measures implemented on March 12, 2020 was associated with an immediate  
102   reduction in  $R_t$  by additional 9.28% (95% CI 6.80%–11.75%).

103

## 104   **Conclusions**

105           The epidemic of COVID-19 sustained over two months in South Korea. Combined non-  
106   pharmaceutical interventions including enhancing the screening and quarantining for suspected  
107   and confirmed cases, and social distancing measures were implemented over time, and our  
108   results suggest the interventions reduced the transmissibility of COVID-19 in the region outside  
109   of the Daegu-Gyengsangbuk provincial region, South Korea. In our analysis of the changes of  
110   transmissibility of COVID-19, we did not include the large clustered cases reported as super  
111   spreading events because in these large clusters the reporting date may not be a good proxy of  
112   the date of infection and would overestimate  $R_t$  (11). We estimated the time delay based on self-

113 reported data. The daily number of confirmed cases from the collected line list we used was very  
114 similar to the official daily reports from the Korean Ministry of Health and Welfare (Appendix).

115

116 In conclusion, our study suggests that the non-pharmaceutical interventions implemented  
117 in Korea during the COVID-19 outbreak were effective in reducing transmissibility and  
118 suppressing local spread. However, the Korean population is still susceptible to further outbreaks  
119 or epidemic waves, and social distancing measures will be relaxed, while there continue to be  
120 opportunities for importation of infections from abroad. Therefore, ongoing monitoring of the  
121 effective reproductive number can provide relevant information to the policymakers to control a  
122 potential second wave of COVID-19.

123

#### 124 **Acknowledgments**

125 We appreciate the Korean public health authorities' response to COVID-19.

126

#### 127 **Funding**

128 Not applicable

129

130 **About the Author**

131 Dr. Ryu is an assistant professor of preventive medicine at Konyang University, Daejeon, South  
132 Korea. His research interests include infectious disease epidemiology with focus on public health  
133 interventions.

134

135 **References**

136 1. Ryu S, Chun BC, Korean Society of Epidemiology -nCo VTFT. An interim review of the  
137 epidemiological characteristics of 2019 novel coronavirus. Epidemiol Health.

138 2020;42:e2020006.

139 2. Korea Centers for Disease Control and Prevention. The updates of COVID-19 in  
140 Republic of Korea. 2020 [cited April 28, 2020]; Available from:

141 <https://www.cdc.go.kr/board/board.es?mid=a30402000000&bid=0030>

142 3. Covid-19 National Emergency Response Center E, Case Management Team KCfDC,  
143 Prevention. Contact Transmission of COVID-19 in South Korea: Novel Investigation  
144 Techniques for Tracing Contacts. Osong Public Health Res Perspect. 2020 Feb;11(1):60-3.

145 4. Zhang J, Litvinova M, Wang W, Wang Y, Deng X, Chen X, et al. Evolving epidemiology  
146 and transmission dynamics of coronavirus disease 2019 outside Hubei province, China: a  
147 descriptive and modelling study. Lancet Infect Dis. 2020 Apr 2.

148 5. Cowling BJ, Ali ST, Ng TWY, Tsang TK, Li JCM, Fong MW, et al. Impact assessment  
149 of non-pharmaceutical interventions against coronavirus disease 2019 and influenza in Hong  
150 Kong: an observational study. Lancet Public Health. 2020 Apr 17.

151 6. Covid-19 National Emergency Response Center E, Case Management Team KCfDC,  
152 Prevention. Coronavirus Disease-19: The First 7,755 Cases in the Republic of Korea. Osong  
153 Public Health Res Perspect. 2020 Apr;11(2):85-90.

- 154 7. Akaike H. Information Theory and an Extension of the Maximum Likelihood Principle.  
155 In: Parzen E, Tanabe K, Kitagawa G, editors. Selected Papers of Hirotugu Akaike. New York,  
156 NY: Springer New York; 1998. p. 199-213.
- 157 8. Du Z, Xu X, Wu Y, Wang L, Cowling BJ, Meyers LA. The serial interval of COVID-19  
158 from publicly reported confirmed cases. medRxiv. 2020:2020.02.19.20025452.
- 159 9. Cori A, Ferguson NM, Fraser C, Cauchemez S. A new framework and software to  
160 estimate time-varying reproduction numbers during epidemics. Am J Epidemiol. 2013 Nov  
161 1;178(9):1505-12.
- 162 10. Thompson RN, Stockwin JE, van Gaalen RD, Polonsky JA, Kamvar ZN, Demarsh PA, et  
163 al. Improved inference of time-varying reproduction numbers during infectious disease  
164 outbreaks. Epidemics. 2019 Dec;29:100356.
- 165 11. Leung K, Wu JT, Liu D, Leung GM. First-wave COVID-19 transmissibility and severity  
166 in China outside Hubei after control measures, and second-wave scenario planning: a modelling  
167 impact assessment. Lancet. 2020 Apr 25;395(10233):1382-93.

168  
169



170 **Table 1.** Demographic characteristics of confirmed cases of COVID-19 infection from publicly  
 171 available data, South Korea, outside of Daegu-Gyeongsangbuk provincial region on April 21,  
 172 2020 (n=2023)

|                                                | All (n=2023) | Period-1<br>(Jan 20 to Feb 23; n=208) | Period-2<br>(Feb 24 to April 21; n=1815) |
|------------------------------------------------|--------------|---------------------------------------|------------------------------------------|
| <b>Age group</b>                               |              |                                       |                                          |
| <b>0-19 years</b>                              | 123 (6%)     | 11 (5%)                               | 112 (6%)                                 |
| <b>19-39 years</b>                             | 715 (35%)    | 104 (50%)                             | 611 (34%)                                |
| <b>40-59 years</b>                             | 619 (31%)    | 50 (24%)                              | 569 (31%)                                |
| <b>60-79 years</b>                             | 295 (15%)    | 37 (18%)                              | 258 (14%)                                |
| <b>≥80 years</b>                               | 50 (3%)      | 6 (3%)                                | 44 (2%)                                  |
| <b>Unknown</b>                                 | 221 (11%)    | 0                                     | 221(12%)                                 |
| <b>Sex</b>                                     |              |                                       |                                          |
| <b>Male</b>                                    | 820 (41%)    | 107 (56%)                             | 713 (39%)                                |
| <b>Female</b>                                  | 953 (47%)    | 100 (43%)                             | 853 (47%)                                |
| <b>Unknown</b>                                 | 250 (12%)    | 1 (1%)                                | 249 (14%)                                |
| <b>Type of transmission</b>                    |              |                                       |                                          |
| <b>Local cases</b>                             | 892 (44%)    | 116 (55%)                             | 776 (43%)                                |
| <b>Imported cases from Daegu-Gyeongsangbuk</b> | 155 (8%)     | 65 (31%)                              | 90 (5%)                                  |
| <b>Imported cases from abroad</b>              | 552 (27%)    | 16 (8%)                               | 536 (30%)                                |
| <b>Cases occurring in large clusters</b>       | 424 (21%)    | 11 (5%)                               | 413 (23%)                                |

173 The period was divided based on the date of symptom onset. If the cases were asymptomatic or the data of symptom onset date  
 174 was not reported, we used the date of confirmation. All the cases has the specific information of the source of infection. If the source  
 175 of infection was not identified, we considered the case occurred by local transmission.  
 176

177 **FIGURE LEGEND**

178 **Figure 1.** Timeline and geographical distribution of occurrence of laboratory-confirmed cases of  
179 COVID-19 in South Korea as of April 21, 2020

180

181 **Figure 2.** Incidence and estimated daily effective reproductive number ( $R_t$ ) of COVID-19 in  
182 regions outside of Daegu-Gyeongsanbuk provincial region, South Korea as of April 21, 2020.  
183 (A) The epidemic curve shows the daily number of symptom onsets of confirmed cases. For  
184 cases that did not report any symptoms at the date of confirmation ( $N=1,205$  cases; 60% of total),  
185 the date of confirmation was plotted instead. (B) A solid line indicates daily estimated  $R_t$  and  
186 gray dashed lines indicate 95% CrI of  $R_t$ ; The gray area indicates the area below the epidemic  
187 threshold of  $R_t=1$ .

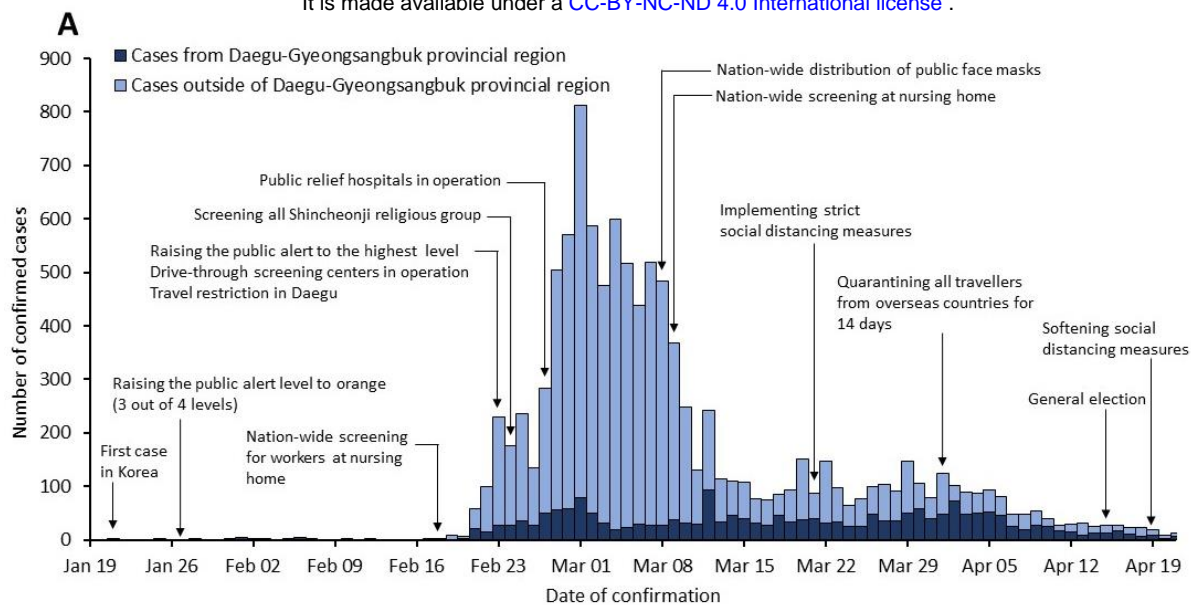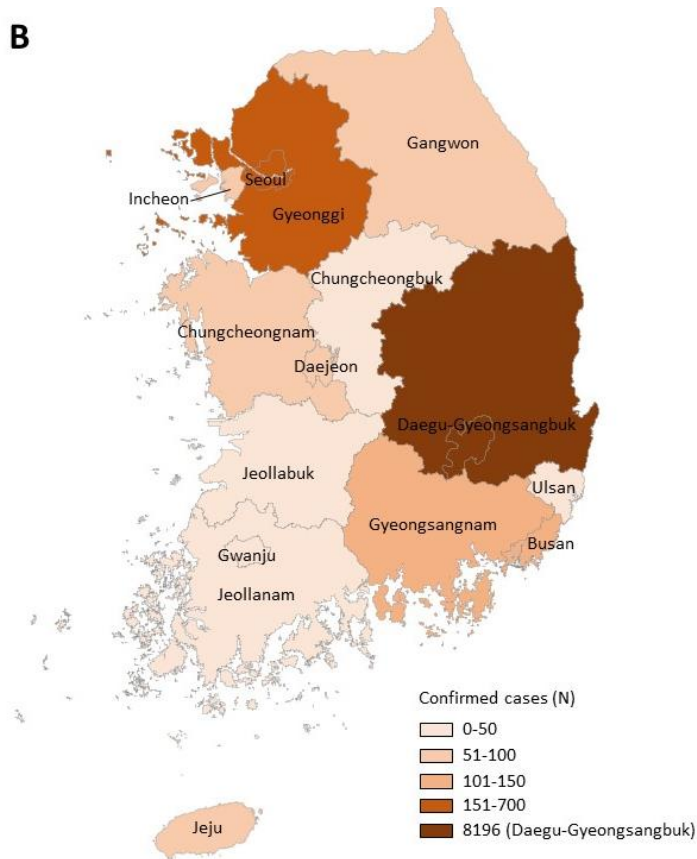

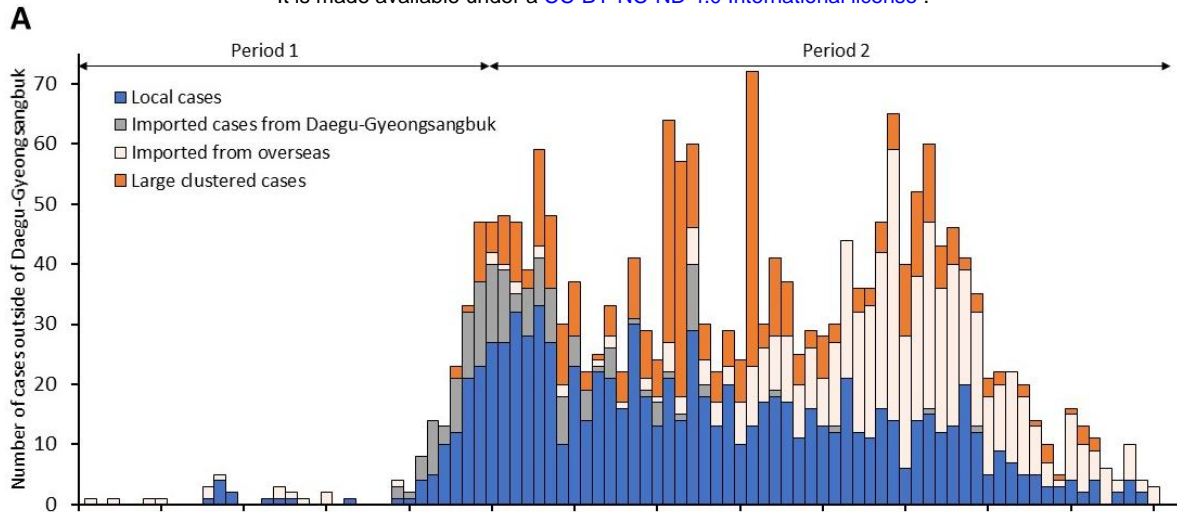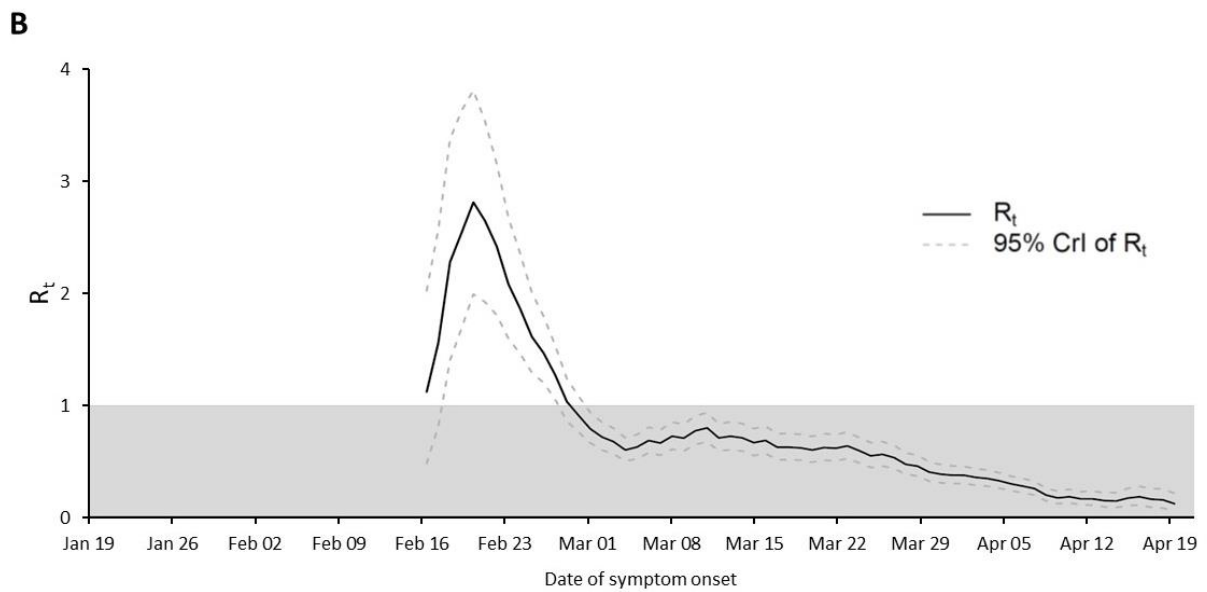

Source: https://medrxiv.org/content/10.1101/2020.04.28.20082750v1.full.pdf
